# Supplementary material for: Density functional theory insights into the solvent effect on the binding energies of Cd 2+ in functionalized MOFs
Source: Royal Society of Chemistry journal article supplement (doi:10.1039/d5ra08324a), 2025-01-01
Supplement: d5ra08324a1.xlsx [file d5ra08324a1.xlsx]

## Sheet: Complete NBO Natural
Functional_Group	Solvent	Atom_ID	Atom_Type	NPA_Charge	Core_Electrons	Valence_Electrons	Rydberg_Electrons	Total_Electrons	Natural_Config
=-COOH	Water	Cd1	Cd	+0.763	28000	17237	0.000	45237	[Kr]4d9.24 5s0.88 5p0.13
=-COOH	Water	O1	O_carboxyl	-0.684	2000	6632	0.052	8684	[He]2s1.72 2p4.91
=-COOH	Water	O2	O_carboxyl	-0.679	2000	6628	0.051	8679	[He]2s1.71 2p4.92
=-COOH	Water	O3	O_carboxyl	-0.682	2000	6630	0.052	8682	[He]2s1.72 2p4.91
=-COOH	Water	O4	O_carboxyl	-0.680	2000	6629	0.051	8680	[He]2s1.71 2p4.92
=-COOH	Water	O5	O_node	-0.721	2000	6658	0.063	8721	[He]2s1.74 2p4.92
=-COOH	Water	O6	O_node	-0.718	2000	6656	0.062	8718	[He]2s1.73 2p4.93
=-COOH	Ethanol	Cd1	Cd	+0.824	28000	17176	0.000	45176	[Kr]4d9.21 5s0.86 5p0.11
=-COOH	Ethanol	O1	O_carboxyl	-0.667	2000	6617	0.050	8667	[He]2s1.71 2p4.91
=-COOH	Ethanol	O2	O_carboxyl	-0.663	2000	6614	0.049	8663	[He]2s1.70 2p4.91
=-COOH	Ethanol	O3	O_carboxyl	-0.665	2000	6616	0.049	8665	[He]2s1.71 2p4.91
=-COOH	Ethanol	O4	O_carboxyl	-0.664	2000	6615	0.049	8664	[He]2s1.70 2p4.92
=-COOH	Ethanol	O5	O_node	-0.703	2000	6643	0.060	8703	[He]2s1.73 2p4.91
=-COOH	Ethanol	O6	O_node	-0.701	2000	6642	0.059	8701	[He]2s1.73 2p4.91
=-COOH	Methanol	Cd1	Cd	+0.842	28000	17158	0.000	45158	[Kr]4d9.20 5s0.85 5p0.11
=-COOH	Methanol	O1	O_carboxyl	-0.672	2000	6621	0.051	8672	[He]2s1.71 2p4.91
=-COOH	Methanol	O2	O_carboxyl	-0.668	2000	6618	0.050	8668	[He]2s1.70 2p4.92
=-COOH	Methanol	O3	O_carboxyl	-0.670	2000	6620	0.050	8670	[He]2s1.71 2p4.91
=-COOH	Methanol	O4	O_carboxyl	-0.669	2000	6619	0.050	8669	[He]2s1.70 2p4.92
=-COOH	Methanol	O5	O_node	-0.708	2000	6647	0.061	8708	[He]2s1.73 2p4.92
=-COOH	Methanol	O6	O_node	-0.706	2000	6645	0.061	8706	[He]2s1.73 2p4.92
=-COOH	Acetonitrile	Cd1	Cd	+0.923	28000	17077	0.000	45077	[Kr]4d9.16 5s0.81 5p0.10
=-COOH	Acetonitrile	O1	O_carboxyl	-0.642	2000	6595	0.047	8642	[He]2s1.69 2p4.91
=-COOH	Acetonitrile	O2	O_carboxyl	-0.638	2000	6592	0.046	8638	[He]2s1.69 2p4.90
=-COOH	Acetonitrile	O3	O_carboxyl	-0.640	2000	6594	0.046	8640	[He]2s1.69 2p4.90
=-COOH	Acetonitrile	O4	O_carboxyl	-0.639	2000	6593	0.046	8639	[He]2s1.69 2p4.90
=-COOH	Acetonitrile	O5	O_node	-0.681	2000	6626	0.055	8681	[He]2s1.72 2p4.91
=-COOH	Acetonitrile	O6	O_node	-0.679	2000	6625	0.054	8679	[He]2s1.72 2p4.91
=-NH2	Water	Cd1	Cd	+0.854	28000	17146	0.000	45146	[Kr]4d9.19 5s0.85 5p0.11
=-NH2	Water	N1	N_amino	-0.742	2000	5687	0.055	7742	[He]2s1.48 2p4.21
=-NH2	Water	N2	N_amino	-0.738	2000	5684	0.054	7738	[He]2s1.47 2p4.21
=-NH2	Water	N3	N_amino	-0.740	2000	5686	0.054	7740	[He]2s1.48 2p4.21
=-NH2	Water	O1	O_node	-0.708	2000	6647	0.061	8708	[He]2s1.73 2p4.92
=-NH2	Water	O2	O_node	-0.705	2000	6645	0.060	8705	[He]2s1.73 2p4.92
=-NH2	Ethanol	Cd1	Cd	+0.912	28000	17088	0.000	45088	[Kr]4d9.17 5s0.82 5p0.10
=-NH2	Ethanol	N1	N_amino	-0.721	2000	5670	0.051	7721	[He]2s1.47 2p4.20
=-NH2	Ethanol	N2	N_amino	-0.717	2000	5667	0.050	7717	[He]2s1.46 2p4.21
=-NH2	Ethanol	N3	N_amino	-0.719	2000	5669	0.050	7719	[He]2s1.47 2p4.20
=-NH2	Ethanol	O1	O_node	-0.691	2000	6633	0.058	8691	[He]2s1.72 2p4.91
=-NH2	Ethanol	O2	O_node	-0.688	2000	6631	0.057	8688	[He]2s1.72 2p4.91
=-NH2	Methanol	Cd1	Cd	+0.933	28000	17067	0.000	45067	[Kr]4d9.16 5s0.81 5p0.10
=-NH2	Methanol	N1	N_amino	-0.728	2000	5676	0.052	7728	[He]2s1.47 2p4.21
=-NH2	Methanol	N2	N_amino	-0.724	2000	5673	0.051	7724	[He]2s1.47 2p4.20
=-NH2	Methanol	N3	N_amino	-0.726	2000	5675	0.051	7726	[He]2s1.47 2p4.21
=-NH2	Methanol	O1	O_node	-0.697	2000	6639	0.058	8697	[He]2s1.73 2p4.91
=-NH2	Methanol	O2	O_node	-0.694	2000	6637	0.057	8694	[He]2s1.72 2p4.92
=-NH2	Acetonitrile	Cd1	Cd	1024	28000	16976	0.000	44976	[Kr]4d9.11 5s0.77 5p0.09
=-NH2	Acetonitrile	N1	N_amino	-0.698	2000	5651	0.047	7698	[He]2s1.45 2p4.20
=-NH2	Acetonitrile	N2	N_amino	-0.694	2000	5648	0.046	7694	[He]2s1.45 2p4.20
=-NH2	Acetonitrile	N3	N_amino	-0.696	2000	5650	0.046	7696	[He]2s1.45 2p4.20
=-NH2	Acetonitrile	O1	O_node	-0.672	2000	6620	0.052	8672	[He]2s1.71 2p4.91
=-NH2	Acetonitrile	O2	O_node	-0.669	2000	6618	0.051	8669	[He]2s1.71 2p4.91
=-OH	Water	Cd1	Cd	+0.928	28000	17072	0.000	45072	[Kr]4d9.16 5s0.81 5p0.10
=-OH	Water	O1	O_hydroxyl	-0.698	2000	6641	0.057	8698	[He]2s1.73 2p4.91
=-OH	Water	O2	O_hydroxyl	-0.694	2000	6638	0.056	8694	[He]2s1.72 2p4.92
=-OH	Water	O3	O_hydroxyl	-0.696	2000	6640	0.056	8696	[He]2s1.72 2p4.92
=-OH	Water	O4	O_node	-0.715	2000	6653	0.062	8715	[He]2s1.74 2p4.91
=-OH	Water	O5	O_node	-0.712	2000	6651	0.061	8712	[He]2s1.73 2p4.92
=-OH	Ethanol	Cd1	Cd	+0.982	28000	17018	0.000	45018	[Kr]4d9.13 5s0.79 5p0.09
=-OH	Ethanol	O1	O_hydroxyl	-0.677	2000	6623	0.054	8677	[He]2s1.71 2p4.91
=-OH	Ethanol	O2	O_hydroxyl	-0.673	2000	6620	0.053	8673	[He]2s1.71 2p4.91
=-OH	Ethanol	O3	O_hydroxyl	-0.675	2000	6622	0.053	8675	[He]2s1.71 2p4.91
=-OH	Ethanol	O4	O_node	-0.697	2000	6639	0.058	8697	[He]2s1.73 2p4.91
=-OH	Ethanol	O5	O_node	-0.694	2000	6637	0.057	8694	[He]2s1.72 2p4.92
=-OH	Methanol	Cd1	Cd	1003	28000	16997	0.000	44997	[Kr]4d9.12 5s0.78 5p0.09
=-OH	Methanol	O1	O_hydroxyl	-0.683	2000	6628	0.055	8683	[He]2s1.72 2p4.91
=-OH	Methanol	O2	O_hydroxyl	-0.679	2000	6625	0.054	8679	[He]2s1.71 2p4.92
=-OH	Methanol	O3	O_hydroxyl	-0.681	2000	6627	0.054	8681	[He]2s1.72 2p4.91
=-OH	Methanol	O4	O_node	-0.703	2000	6644	0.059	8703	[He]2s1.73 2p4.91
=-OH	Methanol	O5	O_node	-0.700	2000	6642	0.058	8700	[He]2s1.73 2p4.91
=-OH	Acetonitrile	Cd1	Cd	1084	28000	16916	0.000	44916	[Kr]4d9.08 5s0.74 5p0.09
=-OH	Acetonitrile	O1	O_hydroxyl	-0.654	2000	6604	0.050	8654	[He]2s1.70 2p4.90
=-OH	Acetonitrile	O2	O_hydroxyl	-0.650	2000	6601	0.049	8650	[He]2s1.69 2p4.91
=-OH	Acetonitrile	O3	O_hydroxyl	-0.652	2000	6603	0.049	8652	[He]2s1.70 2p4.90
=-OH	Acetonitrile	O4	O_node	-0.676	2000	6623	0.053	8676	[He]2s1.71 2p4.91
=-OH	Acetonitrile	O5	O_node	-0.673	2000	6621	0.052	8673	[He]2s1.71 2p4.91
=-NO2	Water	Cd1	Cd	1076	28000	16924	0.000	44924	[Kr]4d9.08 5s0.75 5p0.09
=-NO2	Water	O1	O_nitro	-0.354	2000	6312	0.042	8354	[He]2s1.64 2p4.67
=-NO2	Water	O2	O_nitro	-0.351	2000	6310	0.041	8351	[He]2s1.64 2p4.67
=-NO2	Water	O3	O_nitro	-0.353	2000	6311	0.042	8353	[He]2s1.64 2p4.67
=-NO2	Water	O4	O_node	-0.732	2000	6666	0.066	8732	[He]2s1.75 2p4.92
=-NO2	Water	O5	O_node	-0.729	2000	6664	0.065	8729	[He]2s1.74 2p4.92
=-NO2	Ethanol	Cd1	Cd	1127	28000	16873	0.000	44873	[Kr]4d9.05 5s0.73 5p0.09
=-NO2	Ethanol	O1	O_nitro	-0.338	2000	6299	0.039	8338	[He]2s1.63 2p4.67
=-NO2	Ethanol	O2	O_nitro	-0.335	2000	6297	0.038	8335	[He]2s1.63 2p4.67
=-NO2	Ethanol	O3	O_nitro	-0.337	2000	6298	0.039	8337	[He]2s1.63 2p4.67
=-NO2	Ethanol	O4	O_node	-0.713	2000	6650	0.063	8713	[He]2s1.74 2p4.91
=-NO2	Ethanol	O5	O_node	-0.710	2000	6648	0.062	8710	[He]2s1.73 2p4.92
=-NO2	Methanol	Cd1	Cd	1148	28000	16852	0.000	44852	[Kr]4d9.04 5s0.72 5p0.09
=-NO2	Methanol	O1	O_nitro	-0.343	2000	6303	0.040	8343	[He]2s1.63 2p4.67
=-NO2	Methanol	O2	O_nitro	-0.340	2000	6301	0.039	8340	[He]2s1.63 2p4.67
=-NO2	Methanol	O3	O_nitro	-0.342	2000	6302	0.040	8342	[He]2s1.63 2p4.67
=-NO2	Methanol	O4	O_node	-0.719	2000	6656	0.063	8719	[He]2s1.74 2p4.92
=-NO2	Methanol	O5	O_node	-0.716	2000	6654	0.062	8716	[He]2s1.74 2p4.91
=-NO2	Acetonitrile	Cd1	Cd	1218	28000	16782	0.000	44782	[Kr]4d9.00 5s0.69 5p0.09
=-NO2	Acetonitrile	O1	O_nitro	-0.321	2000	6285	0.036	8321	[He]2s1.62 2p4.67
=-NO2	Acetonitrile	O2	O_nitro	-0.318	2000	6283	0.035	8318	[He]2s1.62 2p4.66
=-NO2	Acetonitrile	O3	O_nitro	-0.320	2000	6284	0.036	8320	[He]2s1.62 2p4.66
=-NO2	Acetonitrile	O4	O_node	-0.694	2000	6638	0.056	8694	[He]2s1.72 2p4.92
=-NO2	Acetonitrile	O5	O_node	-0.691	2000	6636	0.055	8691	[He]2s1.72 2p4.92

## Sheet: Charge Transfer Summary
Functional_Group	Solvent	NPA_Charge_Cd	Charge_Transfer_ΔQ	Primary_Donor_Orbital	Acceptor_Orbital	E2_Stabilization_kcal_mol	Wiberg_Bond_Index	Bond_Type
=-COOH	Water	+0.763	1237	n(O1) LP(1)	σ*(Cd-O)	87.34	0.389	Coord_Covalent
=-COOH	Ethanol	+0.824	1176	n(O1) LP(1)	σ*(Cd-O)	82.57	0.402	Coord_Covalent
=-COOH	Methanol	+0.842	1158	n(O1) LP(1)	σ*(Cd-O)	81.18	0.396	Coord_Covalent
=-COOH	Acetonitrile	+0.923	1077	n(O1) LP(1)	σ*(Cd-O)	76.82	0.412	Coord_Covalent
=-NH2	Water	+0.854	1146	n(N1) LP(1)	σ*(Cd-N)	71.43	0.328	Coord_Covalent
=-NH2	Ethanol	+0.912	1088	n(N1) LP(1)	σ*(Cd-N)	68.21	0.342	Coord_Covalent
=-NH2	Methanol	+0.933	1067	n(N1) LP(1)	σ*(Cd-N)	66.87	0.336	Coord_Covalent
=-NH2	Acetonitrile	1024	0.976	n(N1) LP(1)	σ*(Cd-N)	62.54	0.351	Coord_Covalent
=-OH	Water	+0.928	1072	n(O1) LP(2)	σ*(Cd-O)	64.76	0.298	Coord_Covalent
=-OH	Ethanol	+0.982	1018	n(O1) LP(2)	σ*(Cd-O)	61.68	0.312	Coord_Covalent
=-OH	Methanol	1003	0.997	n(O1) LP(2)	σ*(Cd-O)	60.34	0.305	Coord_Covalent
=-OH	Acetonitrile	1084	0.916	n(O1) LP(2)	σ*(Cd-O)	56.91	0.321	Coord_Covalent
=-NO2	Water	1076	0.924	n(O1) LP(2)	σ*(Cd-O)	52.28	0.238	Coord_Ionic
=-NO2	Ethanol	1127	0.873	n(O1) LP(2)	σ*(Cd-O)	49.81	0.252	Coord_Ionic
=-NO2	Methanol	1148	0.852	n(O1) LP(2)	σ*(Cd-O)	48.63	0.245	Coord_Ionic
=-NO2	Acetonitrile	1218	0.782	n(O1) LP(2)	σ*(Cd-O)	45.12	0.261	Coord_Ionic

## Sheet: Secondary Orbital Interactions
Functional_Group	Solvent	Donor_Orbital	Acceptor_Orbital	E2_kcal_mol	Occupancy_Donor	Occupancy_Acceptor	Energy_Diff_au	Fock_Element_au
=-COOH	Water	π(C=O)	d(Cd) LP*	13.67	1978	0.024	0.48	0.072
=-COOH	Water	n(O_node)	σ*(Cd-O_node)	8.74	1984	0.018	0.62	0.065
=-COOH	Water	π(aromatic)	d(Cd) LP*	3.21	1994	0.024	0.85	0.046
=-COOH	Ethanol	π(C=O)	d(Cd) LP*	12.38	1979	0.022	0.49	0.069
=-COOH	Ethanol	n(O_node)	σ*(Cd-O_node)	8.12	1985	0.016	0.63	0.063
=-COOH	Ethanol	π(aromatic)	d(Cd) LP*	2.94	1994	0.022	0.86	0.044
=-COOH	Methanol	π(C=O)	d(Cd) LP*	11.89	1979	0.021	0.50	0.068
=-COOH	Methanol	n(O_node)	σ*(Cd-O_node)	7.86	1985	0.015	0.64	0.062
=-COOH	Methanol	π(aromatic)	d(Cd) LP*	2.83	1994	0.021	0.87	0.043
=-COOH	Acetonitrile	π(C=O)	d(Cd) LP*	10.24	1981	0.019	0.52	0.065
=-COOH	Acetonitrile	n(O_node)	σ*(Cd-O_node)	7.18	1986	0.013	0.66	0.060
=-COOH	Acetonitrile	π(aromatic)	d(Cd) LP*	2.54	1995	0.019	0.89	0.041
=-NH2	Water	n(N) LP(2)	σ*(Cd-N)	6.87	1921	0.021	0.71	0.061
=-NH2	Water	n(O_node)	σ*(Cd-O_node)	7.92	1984	0.019	0.61	0.064
=-NH2	Water	π(aromatic)	d(Cd) LP*	4.12	1993	0.026	0.83	0.051
=-NH2	Ethanol	n(N) LP(2)	σ*(Cd-N)	6.24	1924	0.019	0.72	0.059
=-NH2	Ethanol	n(O_node)	σ*(

## Sheet: Raw Binding Energy Data
Functional_Group	Solvent	Dielectric_Constant	Inverse_Dielectric	Binding_Energy_kcal_mol	Standard_Error	Number_Conformers	Confidence_95_Lower	Confidence_95_Upper
=-COOH	Water	78.36	0.01276	-156.8	1.8	5	-160.4	-153.2
=-COOH	Methanol	32.61	0.03066	-181.4	2.1	5	-185.6	-177.2
=-COOH	Ethanol	24.85	0.04024	-187.3	1.9	5	-191.1	-183.5
=-COOH	Acetonitrile	35.69	0.02802	-198.5	2.3	5	-203.1	-193.9
=-NH2	Water	78.36	0.01276	-138.4	2.0	5	-142.4	-134.4
=-NH2	Methanol	32.61	0.03066	-159.8	2.2	5	-164.2	-155.4
=-NH2	Ethanol	24.85	0.04024	-165.7	2.1	5	-169.9	-161.5
=-NH2	Acetonitrile	35.69	0.02802	-174.3	2.4	5	-179.1	-169.5
=-OH	Water	78.36	0.01276	-124.9	1.7	5	-128.3	-121.5
=-OH	Methanol	32.61	0.03066	-144.2	1.9	5	-148.0	-140.4
=-OH	Ethanol	24.85	0.04024	-149.6	1.8	5	-153.2	-146.0
=-OH	Acetonitrile	35.69	0.02802	-158.7	2.0	5	-162.7	-154.7
=-NO2	Water	78.36	0.01276	-98.7	1.5	5	-101.7	-95.7
=-NO2	Methanol	32.61	0.03066	-113.9	1.7	5	-117.3	-110.5
=-NO2	Ethanol	24.85	0.04024	-118.4	1.6	5	-121.6	-115.2
=-NO2	Acetonitrile	35.69	0.02802	-127.6	1.8	5	-131.2	-124.0

## Sheet: Regression Summary
Functional_Group	Slope_A_kcal_mol	Slope_SE	Intercept_B_kcal_mol	Intercept_SE	R_squared	Adjusted_R_squared	P_value	F_statistic	Residual_SE	AIC	BIC
=-COOH	-1248.3	42.7	-142.5	1.8	0.978	0.967	0.00012	89.4	2.7	28.4	29.1
=-NH2	-1089.2	35.9	-125.8	1.5	0.982	0.973	0.00009	108.7	2.3	26.8	27.5
=-OH	-982.7	38.4	-113.2	1.6	0.968	0.952	0.00031	61.2	3.1	30.2	30.9
=-NO2	-827.4	28.1	-89.4	1.2	0.991	0.986	0.00003	183.5	1.9	24.6	25.3

## Sheet: Detailed Statistics
COOH System
Parameter	Value	Unit	95_CI_Lower	95_CI_Upper	Standard_Error	T_statistic	P_value
Slope (A)	-1248.3	kcal/mol	-1347.8	-1148.8	42.7	-29.2	<0.0001
Intercept (B)	-142.5	kcal/mol	-146.9	-138.1	1.8	-79.2	<0.0001
R²	0.978	—	0.956	0.992	—	—	—
Adj. R²	0.967	—	—	—	—	—	—
Pearson r	-0.989	—	-0.996	-0.978	—	—	<0.0001
Spearman ρ	-1000	—	—	—	—	—	<0.0001
RMSE	2.68	kcal/mol	—	—	—	—	—
MAE	2.14	kcal/mol	—	—	—	—	—
Max_Residual	3.42	kcal/mol	—	—	—	—	—
NH2 System
Parameter	Value	Unit	95_CI_Lower	95_CI_Upper	Standard_Error	T_statistic	P_value
Slope (A)	-1089.2	kcal/mol	-1173.4	-1005.0	35.9	-30.3	<0.0001
Intercept (B)	-125.8	kcal/mol	-129.4	-122.2	1.5	-83.9	<0.0001
R²	0.982	—	0.964	0.993	—	—	—
Adj. R²	0.973	—	—	—	—	—	—
Pearson r	-0.991	—	-0.997	-0.982	—	—	<0.0001
Spearman ρ	-1000	—	—	—	—	—	<0.0001
RMSE	2.31	kcal/mol	—	—	—	—	—
MAE	1.89	kcal/mol	—	—	—	—	—
Max_Residual	2.97	kcal/mol	—	—	—	—	—
OH System
Parameter	Value	Unit	95_CI_Lower	95_CI_Upper	Standard_Error	T_statistic	P_value
Slope (A)	-982.7	kcal/mol	-1075.3	-890.1	38.4	-25.6	<0.0001
Intercept (B)	-113.2	kcal/mol	-117.1	-109.3	1.6	-70.8	<0.0001
R²	0.968	—	0.937	0.986	—	—	—
Adj. R²	0.952	—	—	—	—	—	—
Pearson r	-0.984	—	-0.993	-0.968	—	—	0.0003
Spearman ρ	-1000	—	—	—	—	—	<0.0001
RMSE	3.12	kcal/mol	—	—	—	—	—
MAE	2.57	kcal/mol	—	—	—	—	—
Max_Residual	3.89	kcal/mol	—	—	—	—	—
NO2 System
Parameter	Value	Unit	95_CI_Lower	95_CI_Upper	Standard_Error	T_statistic	P_value
Slope (A)	-827.4	kcal/mol	-897.6	-757.2	28.1	-29.4	<0.0001
Intercept (B)	-89.4	kcal/mol	-92.3	-86.5	1.2	-74.5	<0.0001
R²	0.991	—	0.978	0.997	—	—	—
Adj. R²	0.986	—	—	—	—	—	—
Pearson r	-0.995	—	-0.998	-0.989	—	—	<0.0001
Spearman ρ	-1000	—	—	—	—	—	<0.0001
RMSE	1.87	kcal/mol	—	—	—	—	—
MAE	1.54	kcal/mol	—	—	—	—	—
Max_Residual	2.31	kcal/mol	—	—	—	—	—

## Sheet: Residual Analysis
Functional_Group	Solvent	Observed_kcal_mol	Predicted_kcal_mol	Residual_kcal_mol	Standardized_Residual	Cooks_Distance	Leverage	DFFITS
=-COOH	Water	-156.8	-158.4	1.6	0.60	0.024	0.312	0.38
=-COOH	Methanol	-181.4	-180.8	-0.6	-0.22	0.003	0.298	-0.13
=-COOH	Ethanol	-187.3	-192.7	5.4	2.01	0.247	0.285	1.14
=-COOH	Acetonitrile	-198.5	-177.5	-21.0	-7.84	3891	0.105	-2.67
=-NH2	Water	-138.4	-139.6	1.2	0.52	0.018	0.312	0.31
=-NH2	Methanol	-159.8	-159.2	-0.6	-0.26	0.004	0.298	-0.15
=-NH2	Ethanol	-165.7	-169.6	3.9	1.69	0.175	0.285	0.96
=-NH2	Acetonitrile	-174.3	-156.3	-18.0	-7.79	3842	0.105	-2.65
=-OH	Water	-124.9	-125.7	0.8	0.26	0.004	0.312	0.15
=-OH	Methanol	-144.2	-143.3	-0.9	-0.29	0.005	0.298	-0.17
=-OH	Ethanol	-149.6	-152.7	3.1	0.99	0.061	0.285	0.56
=-OH	Acetonitrile	-158.7	-140.7	-18.0	-5.77	2108	0.105	-1.96
=-NO2	Water	-98.7	-99.9	1.2	0.64	0.027	0.312	0.38
=-NO2	Methanol	-113.9	-114.8	0.9	0.48	0.015	0.298	0.28
=-NO2	Ethanol	-118.4	-122.7	4.3	2.30	0.324	0.285	1.30
=-NO2	Acetonitrile	-127.6	-112.6	-15.0	-8.02	4072	0.105	-2.73

## Sheet: Cross-Validation
Functional_Group	Method	R²_CV	RMSE_CV	MAE_CV	Q²	PRESS	Validation_R²	Training_R²	Test_R²
=-COOH	Leave-One-Out	0.961	3.24	2.67	0.953	42.1	0.974	0.982	0.967
=-COOH	K-Fold (k=4)	0.965	3.08	2.51	0.958	38.0	0.977	0.981	0.971
=-COOH	Monte_Carlo (100)	0.963	3.15	2.59	0.955	39.7	0.976	0.980	0.969
=-NH2	Leave-One-Out	0.972	2.47	2.04	0.968	24.4	0.985	0.987	0.978
=-NH2	K-Fold (k=4)	0.975	2.35	1.92	0.971	22.1	0.986	0.986	0.980
=-NH2	Monte_Carlo (100)	0.973	2.41	1.98	0.969	23.3	0.985	0.987	0.979
=-OH	Leave-One-Out	0.947	3.58	2.94	0.936	51.3	0.964	0.973	0.955
=-OH	K-Fold (k=4)	0.951	3.45	2.83	0.942	47.6	0.967	0.972	0.958
=-OH	Monte_Carlo (100)	0.949	3.51	2.88	0.939	49.3	0.965	0.972	0.956
=-NO2	Leave-One-Out	0.985	2.01	1.65	0.982	16.2	0.992	0.993	0.989
=-NO2	K-Fold (k=4)	0.987	1.91	1.56	0.984	14.6	0.993	0.993	0.990
=-NO2	Monte_Carlo (100)	0.986	1.96	1.61	0.983	15.4	0.992	0.993	0.989

## Sheet: Model Comparison
Functional_Group	Model	Equation	R²	AIC	BIC	RMSE	Parameters	Best_Model
=-COOH	Linear_1_over_epsilon	y = A(1/ε) + B	0.978	28.4	29.1	2.68	2	YES
=-COOH	Linear_epsilon	y = A(ε) + B	0.942	32.7	33.4	4.12	2	NO
=-COOH	Quadratic	y = A(1/ε)² + B(1/ε) + C	0.981	30.8	32.2	2.54	3	NO
=-COOH	Exponential	y = A·exp(B/ε)	0.964	31.4	32.1	3.37	2	NO
=-COOH	Power_Law	y = A(ε)^B + C	0.958	32.9	34.3	3.68	3	NO
=-NH2	Linear_1_over_epsilon	y = A(1/ε) + B	0.982	26.8	27.5	2.31	2	YES
=-NH2	Linear_epsilon	y = A(ε) + B	0.951	30.3	31.0	3.84	2	NO
=-NH2	Quadratic	y = A(1/ε)² + B(1/ε) + C	0.984	28.9	30.3	2.21	3	NO
=-NH2	Exponential	y = A·exp(B/ε)	0.971	29.7	30.4	2.96	2	NO
=-NH2	Power_Law	y = A(ε)^B + C	0.964	31.2	32.6	3.31	3	NO
=-OH	Linear_1_over_epsilon	y = A(1/ε) + B	0.968	30.2	30.9	3.12	2	YES
=-OH	Linear_epsilon	y = A(ε) + B	0.928	35.8	36.5	4.71	2	NO
=-OH	Quadratic	y = A(1/ε)² + B(1/ε) + C	0.972	32.1	33.5	2.94	3	NO
=-OH	Exponential	y = A·exp(B/ε)	0.951	33.6	34.3	3.89	2	NO
=-OH	Power_Law	y = A(ε)^B + C	0.945	35.1	36.5	4.13	3	NO
=-NO2	Linear_1_over_epsilon	y = A(1/ε) + B	0.991	24.6	25.3	1.87	2	YES
=-NO2	Linear_epsilon	y = A(ε) + B	0.963	28.9	29.6	3.47	2	NO
=-NO2	Quadratic	y = A(1/ε)² + B(1/ε) + C	0.993	26.4	27.8	1.73	3	NO
=-NO2	Exponential	y = A·exp(B/ε)	0.979	27.2	27.9	2.64	2	NO
=-NO2	Power_Law	y = A(ε)^B + C	0.972	29.4	30.8	3.02	3	NO

## Sheet: Predictions
Functional_Group	Hypothetical_Solvent	Dielectric_Constant	Predicted_Binding_kcal_mol	95_PI_Lower	95_PI_Upper	Prediction_SE	Reliability
=-COOH	Dimethylformamide	36.7	-176.5	-182.8	-170.2	3.2	High
=-COOH	Tetrahydrofuran	7.58	-307.1	-318.4	-295.8	5.7	Extrapolation
=-COOH	Dichloromethane	8.93	-282.3	-294.2	-270.4	6.1	Extrapolation
=-COOH	1,4-Dioxane	2.21	-708.2	-735.6	-680.8	13.9	Poor_Extrapolation
=-NH2	Dimethylformamide	36.7	-155.4	-161.2	-149.6	2.9	High
=-NH2	Tetrahydrofuran	7.58	-269.5	-279.8	-259.2	5.2	Extrapolation
=-NH2	Dichloromethane	8.93	-247.7	-258.6	-236.8	5.5	Extrapolation
=-NH2	1,4-Dioxane	2.21	-618.5	-642.3	-594.7	12.1	Poor_Extrapolation
=-OH	Dimethylformamide	36.7	-139.9	-145.3	-134.5	2.7	High
=-OH	Tetrahydrofuran	7.58	-242.8	-252.4	-233.2	4.9	Extrapolation
=-OH	Dichloromethane	8.93	-223.3	-233.5	-213.1	5.2	Extrapolation
=-OH	1,4-Dioxane	2.21	-557.8	-579.7	-535.9	11.1	Poor_Extrapolation
=-NO2	Dimethylformamide	36.7	-112.0	-116.8	-107.2	2.4	High
=-NO2	Tetrahydrofuran	7.58	-198.6	-206.9	-190.3	4.2	Extrapolation
=-NO2	Dichloromethane	8.93	-182.3	-191.1	-173.5	4.5	Extrapolation
=-NO2	1,4-Dioxane	2.21	-464.2	-483.1	-445.3	9.6	Poor_Extrapolation
