# Supplementary material for: Density functional theory insights into the solvent effect on the binding energies of Cd 2+ in functionalized MOFs
Source: Royal Society of Chemistry journal article supplement (doi:10.1039/d5ra08324a), 2025-01-01
Supplement: d5ra08324a2.pdf [file d5ra08324a2.pdf]

## Supplementary Information

Basis set superposition error (BSSE) corrections (kcal/mol) computed via counterpoise method

### System Water Ethanol Methanol Acetonitrile

|                  |     |     |     |     |
|------------------|-----|-----|-----|-----|
| -COOH            | 7.8 | 6.9 | 7.2 | 6.4 |
| -NH <sub>2</sub> | 6.4 | 5.7 | 5.9 | 5.3 |
| -OH              | 5.9 | 5.2 | 5.5 | 4.9 |
| -NO <sub>2</sub> | 4.8 | 4.2 | 4.5 | 3.9 |

Solvation free energies ( $\Delta G_{\text{solv}}$ , kcal/mol) for isolated species

### Species Water Ethanol Methanol Acetonitrile

|                     |        |        |        |        |
|---------------------|--------|--------|--------|--------|
| Cd <sup>2+</sup>    | -456.3 | -389.7 | -412.4 | -378.2 |
| MOF-COOH            | -87.4  | -62.8  | -69.3  | -58.7  |
| MOF-NH <sub>2</sub> | -94.7  | -68.5  | -75.1  | -64.2  |
| MOF-OH              | -103.2 | -76.9  | -83.8  | -71.4  |
| MOF-NO <sub>2</sub> | -68.9  | -51.3  | -56.7  | -47.8  |

Second-order NBO perturbation energies ( $E^{(2)}$ , kcal/mol) for key orbital interactions beyond primary coordination

| Interaction Type                                                             | -COOH | -NH <sub>2</sub> | -OH | -NO <sub>2</sub> |
|------------------------------------------------------------------------------|-------|------------------|-----|------------------|
| $\pi(\text{C}=\text{O}) \rightarrow \text{d}(\text{Cd})$ back-donation       | 12.4  | —                | —   | —                |
| $\text{LP}(\text{O}_{\text{node}}) \rightarrow \sigma^*(\text{Cd}-\text{O})$ | 8.7   | 7.9              | 6.8 | 5.2              |
| $\pi(\text{aromatic}) \rightarrow \text{d}(\text{Cd})$                       | 3.2   | 4.1              | 3.6 | 2.8              |

Comparison of M06-2X with alternative density functionals for benchmark Cd<sup>2+</sup>-acetate complex in water

| Functional        | $\Delta G_{\text{bind}}$ (kcal/mol) | Cd-O distance (Å) | Error vs. Expt. |
|-------------------|-------------------------------------|-------------------|-----------------|
| M06-2X            | -43.6                               | 2.29              | +2.3 kcal/mol   |
| B3LYP             | -38.2                               | 2.35              | -3.1 kcal/mol   |
| PBE0              | -40.1                               | 2.32              | +0.8 kcal/mol   |
| $\omega$ B97X-D   | -44.8                               | 2.27              | +3.5 kcal/mol   |
| Experimental [49] | $-41.3 \pm 2$                       | $2.31 \pm 0.03$   | Reference       |

## Appendix A. Additional Computational Details

### A.1. Basis Set Convergence Analysis

Systematic basis set expansion from def2-SVP  $\rightarrow$  def2-TZVP  $\rightarrow$  def2-QZVP for the -COOH/water system yielded binding energies of -149.2, -156.8, and -158.4 kcal/mol respectively. The 1.6 kcal/mol difference between def2-TZVP and def2-QZVP (1.0% error) validates def2-

TZVP as converged for predictive purposes, particularly considering 10× lower computational cost.

## **A.2. Integration Grid Specifications**

The ultrafine pruned grid specification (99,590) was validated against superfine grid (150,974) for representative systems, showing energy differences < 0.3 kcal/mol. Vibrational frequencies differed by < 2 cm<sup>-1</sup>, confirming numerical adequacy.

## **A.3. SCF Convergence Challenges and Solutions**

Several systems (particularly -NO<sub>2</sub> functionalized MOFs in low-polarity solvents) exhibited SCF convergence difficulties attributed to near-degeneracies in frontier orbitals. Quadratically convergent SCF (QC-SCF) algorithm with damping factor 0.2-0.4 successfully achieved convergence in 45-65 iterations. Alternative approaches including level-shifting and DIIS extrapolation were less effective for these transition metal systems.

## **A.4. Frequency Scaling Factors**

Harmonic vibrational frequencies were scaled by 0.970 to account for anharmonicity and systematic functional errors. Zero-point energies and thermal corrections incorporate this scaling.

## **A.5. Counterpoise Procedure Implementation**

BSSE corrections employed the full counterpoise procedure evaluating:

- E(MOF) in basis set of MOF-Cd complex
- E(Cd<sup>2+</sup>) in basis set of MOF-Cd complex
- E(MOF-Cd) in full basis set

Ghost atoms maintaining basis functions without nuclear charges represented absent fragments. BSSE values of 3.9-7.8 kcal/mol (2.5-4.9% of uncorrected binding energies) confirm def2-TZVP minimizes artificial stabilization.

## **Appendix B. Validation Studies**

### **B.1. Comparison with Experimental Structural Data**

Our calculated Cd-O bond distances in carboxylate coordination (2.26-2.29 Å in water) agree excellently with:

- EXAFS for Cd-MOF-5: 2.31 ± 0.04 Å [Reference]
- Crystal structure Cd(acetate)<sub>2</sub>·2H<sub>2</sub>O: 2.28 Å [Cambridge Structural Database]
- Neutron diffraction Cd(formate)<sub>2</sub>: 2.27 Å [Literature]

Root-mean-square deviation of 0.028 Å validates structural predictions.

## B.2. Thermodynamic Validation

Computed binding enthalpies ( $\Delta H_{\text{bind}} = -183.4$  kcal/mol for -COOH/water) translate to  $\sim 46$  kcal/mol per coordinating carboxylate (assuming tetradentate coordination). Experimental calorimetry for  $\text{Cd}^{2+} + \text{acetate} \rightarrow \text{Cd}(\text{acetate})^+$  yields  $\Delta H = -8.7$  kcal/mol per acetate [literature], with four coordinations giving  $-34.8$  kcal/mol—within 25% of our value considering differences in coordination geometry and chelate effects.

## B.3. Solvation Free Energy Validation

Calculated  $\text{Cd}^{2+}$  solvation free energies:

- Water:  $-456.3$  kcal/mol (experimental:  $-458 \pm 4$  kcal/mol)
- Methanol:  $-412.4$  kcal/mol (experimental:  $-405 \pm 8$  kcal/mol)
- Acetonitrile:  $-378.2$  kcal/mol (experimental:  $-371 \pm 12$  kcal/mol)

Mean unsigned error of  $4.7$  kcal/mol confirms SMD accuracy for these systems.

## B.4. Statistical Uncertainty Quantification

Multiple starting geometries (5 conformers per system) converged to binding energies with standard deviations:

- -COOH systems:  $\sigma = 1.8\text{-}2.1$  kcal/mol
- -NH<sub>2</sub> systems:  $\sigma = 2.0\text{-}2.4$  kcal/mol
- -OH systems:  $\sigma = 1.7\text{-}2.2$  kcal/mol
- -NO<sub>2</sub> systems:  $\sigma = 1.5\text{-}1.9$  kcal/mol

These uncertainties are smaller than chemical accuracy targets ( $\pm 2$  kcal/mol) and systematic functional errors.
